# Supplementary material for: HCV Core Protein Induces Chemokine CCL2 and CXCL10 Expression Through NF-κB Signaling Pathway in Macrophages
Source: PubMed Central journal article supplement (PMC8438213; doi:10.3389/fimmu.2021.654998), 2021-08-31
Supplement: DataSheet_1.pdf [file DataSheet_1.pdf]

**Supplementary Table 1** Detailed information for genes that have been significantly altered in MΦ-THP-1 treated with HCV core protein based on PCR Array Analysis.

| <b>Gene</b>       | <b>Location</b>      | <b>Function</b>                                                                                                                                                                   |
|-------------------|----------------------|-----------------------------------------------------------------------------------------------------------------------------------------------------------------------------------|
| Upregulated genes |                      |                                                                                                                                                                                   |
| <b>CCL2</b>       | <b>17q11.2-q21.1</b> | <b>Chemotactic factor that attracts monocytes and basophils. Augments monocyte anti-tumor activity.</b>                                                                           |
| CCL20             | 2q36.3               | Chemotactic factor that attracts lymphocytes .<br>Inhibits proliferation of myeloid progenitors in colony formation assays.                                                       |
| CCL22             | 16q13                | Chemotactic for monocytes, dendritic cells and natural killer cells.                                                                                                              |
| CCL4              | 17q21-q23            | Monokine with inflammatory and chemokinetic properties. Binds to CCR5.                                                                                                            |
| CCL5              | 17q11.2-q12          | Chemoattractant for blood monocytes, memory T-helper cells and eosinophils.<br>Binds to CCR1, CCR3, CCR4 and CCR5.                                                                |
| CCR1              | 3p21                 | Receptor for a C-C type chemokine. Binds to MIP-1-alpha, MIP-1-delta, RANTES, and MCP-3.                                                                                          |
| CCR7              | 17q12-q21.2          | Receptor for the MIP-3-beta chemokine.                                                                                                                                            |
| CD274             | 9p24.1               | Costimulatory signal, essential for T-cell proliferation and production of IL10 and IFNG.                                                                                         |
| CSF3              | 17q11.2-q12          | Induce granulocytes.                                                                                                                                                              |
| <b>CXCL10</b>     | <b>4q21</b>          | <b>Chemotactic for monocytes and T-lymphocytes. Binds to CXCR3</b>                                                                                                                |
| CXCL12            | 10q11.1              | Chemoattractant active on T-lymphocytes, monocytes, but not neutrophils.                                                                                                          |
| CXCL9             | 4q21                 | Cytokine that affects the growth, movement, or activation state of cells that participate in immune and inflammatory response. Chemotactic for activated T-cells. Binds to CXCR3. |
| CXCR3             | Xq13                 | Receptor for the C-X-C chemokine CXCL9, CXCL10 and CXCL11. Bind to CCL21.                                                                                                         |
| EGF               | 4q25                 | Stimulate the growth of various epidermal and epithelial tissues                                                                                                                  |
| FASLG             | 1q23                 | Cytokine that binds to TNFRSF6/FAS, a receptor that transduces the apoptotic signal into cells.                                                                                   |
| GBP1              | 1p22.2               | Hydrolyzes GTP to GMP in two consecutive cleavage reactions.<br>Exhibits antiviral activity against influenza virus.                                                              |
| IDO1              | 8p12-p11             | Catalyzes the cleavage of the pyrrol ring of tryptophan and incorporates both atoms of a molecule of oxygen                                                                       |
| IL10              | 1q31-q32             | Inhibits the synthesis of a number of cytokines, including IFN-gamma, IL-2, IL-3,                                                                                                 |

TNF and GM-CSF produced by activated macrophages and by helper T-cells.

|                    |                  |                                                                                                                                                                                                      |
|--------------------|------------------|------------------------------------------------------------------------------------------------------------------------------------------------------------------------------------------------------|
| IL12B              | 5q31.1-<br>q33.1 | Cytokine that can act as a growth factor for activated T and NK cells, enhance the lytic activity of NK/lymphokine-activated killer cells, and stimulate the production of IFN-gamma by resting PBMC |
| IL15               | 4q31             | Cytokine that stimulates the proliferation of T-lymphocytes.                                                                                                                                         |
| IL1B               | 2q14             | IL-1 stimulates thymocyte proliferation by inducing IL-2 release, B-cell maturation and proliferation, and fibroblast growth factor activity.                                                        |
| IL23A              | 12q13.13         | Associates with IL12B to form the IL-23 interleukin, a heterodimeric cytokine which functions in innate and adaptive immunity.                                                                       |
| IL6                | 7p21-p15         | Cytokine with a wide variety of biological functions                                                                                                                                                 |
| IL8                | 4q13-q21         | IL-8 is a chemotactic factor that attracts neutrophils, basophils, and T-cells, but not monocytes. It is also involved in neutrophil activation.                                                     |
| IRF1               | 5q23-q31         | Transcriptional regulator which displays a remarkable functional diversity in the regulation of cellular responses.                                                                                  |
| KITLG              | 12q22            | Ligand for the receptor-type protein-tyrosine kinase KIT.                                                                                                                                            |
| MICB               | 6p21.3           | Acts as a stress-induced self-antigen that is recognized by gamma delta T cells.<br>Ligand for the KLRK1/NKG2D receptor. Binding to KLRK1 leads to cell lysis.                                       |
| MYD88              | 3p22             | Adapter protein involved in the Toll-like receptor and IL-1 receptor signaling pathway in the innate immune response.                                                                                |
| STAT1              | 2q32.2-<br>q32.3 | Signal transducer and transcription activator that mediates cellular responses to interferons (IFNs), cytokine KITLG/SCF and other cytokines and other growth factors.                               |
| TLR3               | 4q35             | TLR3 is a nucleotide-sensing TLR which is activated by double-stranded RNA, a sign of viral infection.                                                                                               |
| TLR4               | 9q33.1           | Cooperates with LY96 and CD14 to mediate the innate immune response to bacterial lipopolysaccharide(LPS).                                                                                            |
| TNF                | 6p21.3           | Cytokine that binds to TNFRSF1A/TNFR1 and TNFRSF1B/TNFR2.                                                                                                                                            |
| TNFSF10            | 3q26             | Induces apoptosis.                                                                                                                                                                                   |
| <hr/>              |                  |                                                                                                                                                                                                      |
| Downregulated gene |                  |                                                                                                                                                                                                      |
| CCL28              | 5p12             | Chemotactic activity for resting CD4, CD8 T-cells and eosinophils. Binds to CCR3 and CCR10 and induces calcium mobilization in a dose-dependent manner.                                              |
| NOS2               | 17q11.2-q12      | Produces nitric oxide (NO) which is a messenger molecule with diverse functions throughout the body.                                                                                                 |

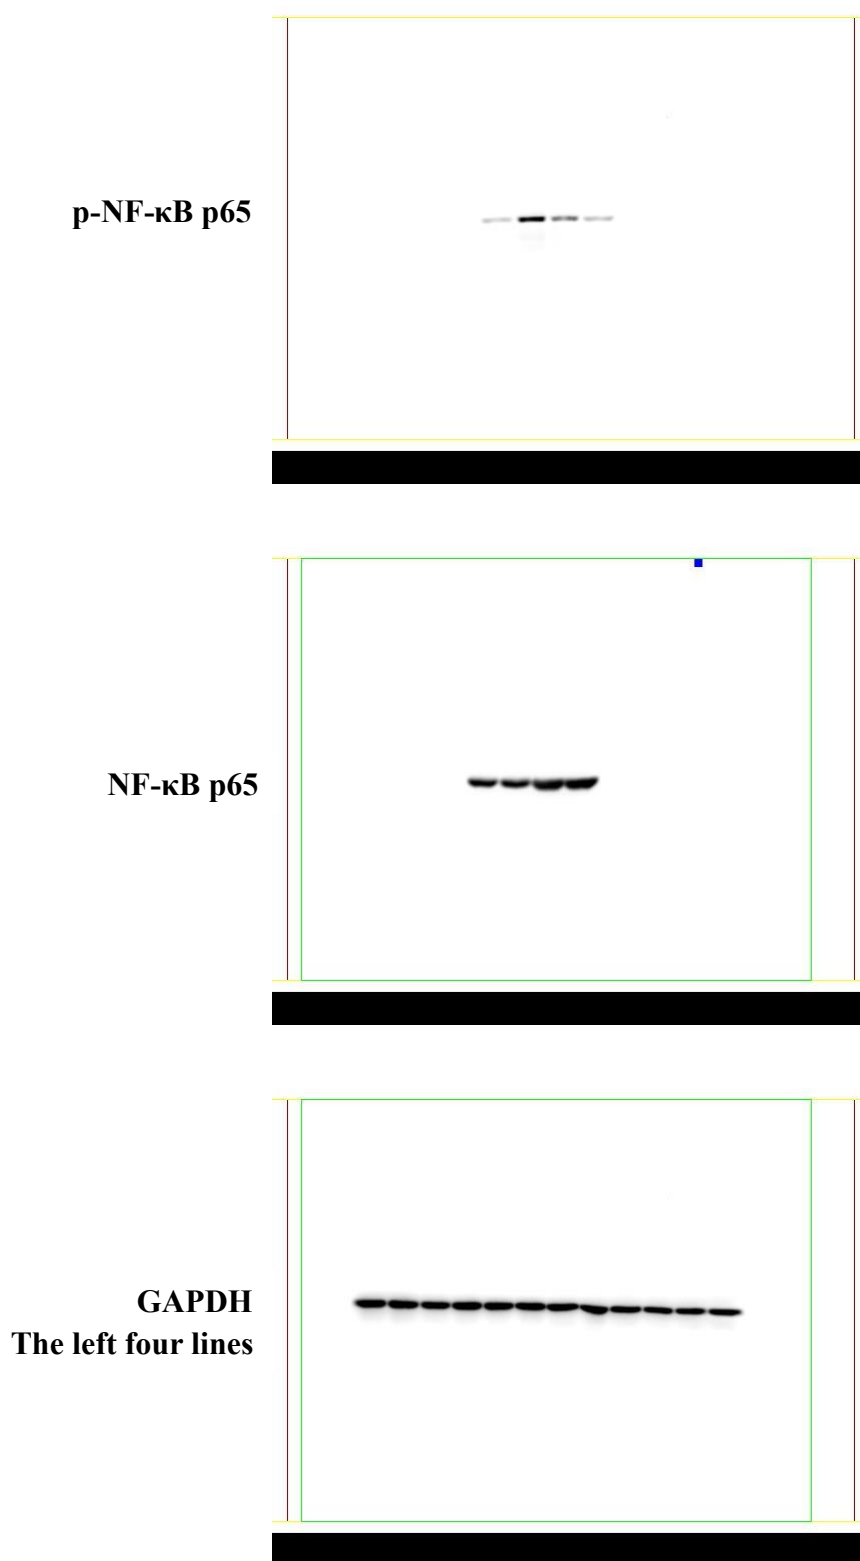

**Supplementary Figure 1** MΦ-THP-1 was pretreated with inhibitor IMD 0354(1μM or 3μM) for 30 min and then treated with HCV core protein for 30 min followed by analysis of p-NF-κB p65, NF-κB p65 and GAPDH expression by Western blotting.

**p-AKT**

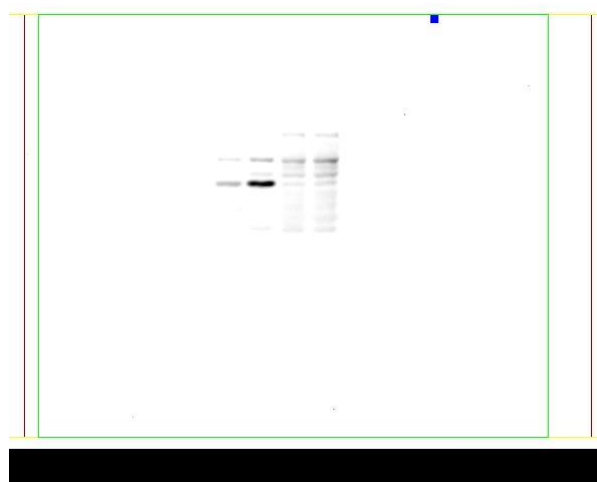

**AKT**

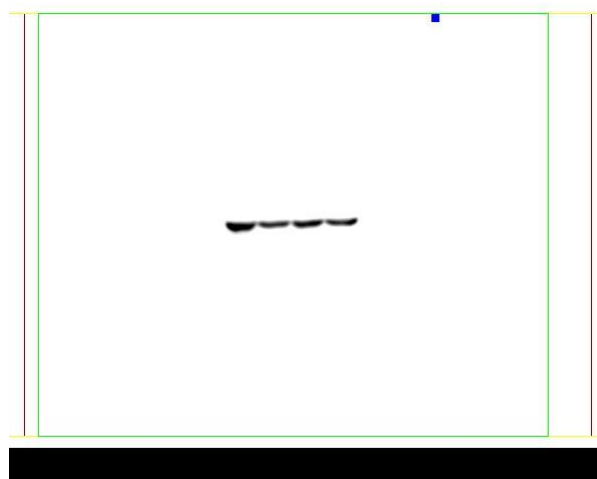

**GAPDH**

**The middle four lines**

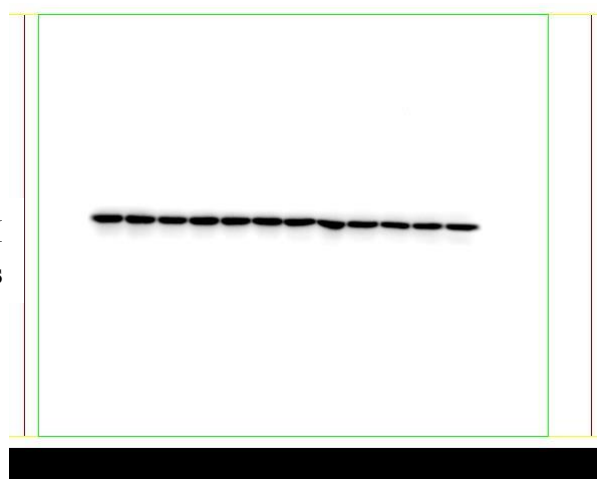

**Supplementary Figure 2** MΦ-THP-1 was pretreated with inhibitor MK 2206 2HCl (5  $\mu$ M or 10  $\mu$ M) for 30 min and then treated with HCV core protein for 30 min followed by analysis of p-AKT, AKT and GAPDH expression by Western blotting.

**p-JNK**

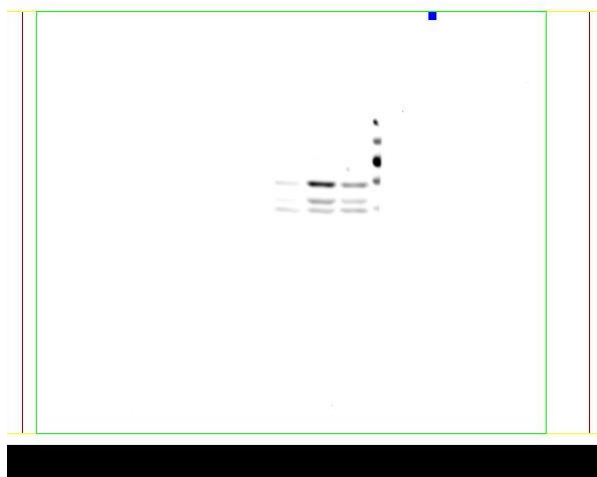

**JNK**

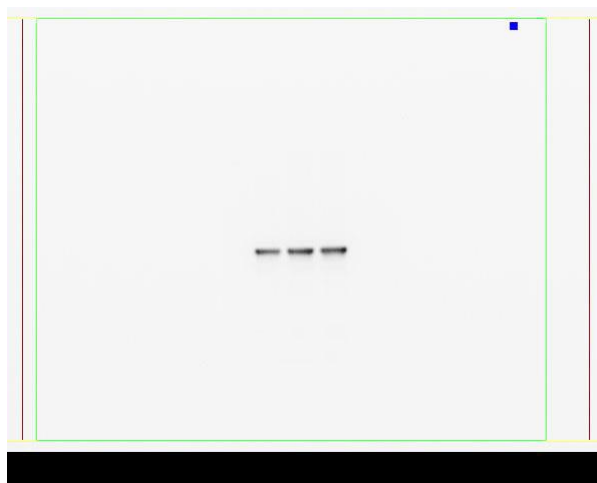

**GAPDH**

The right three lines

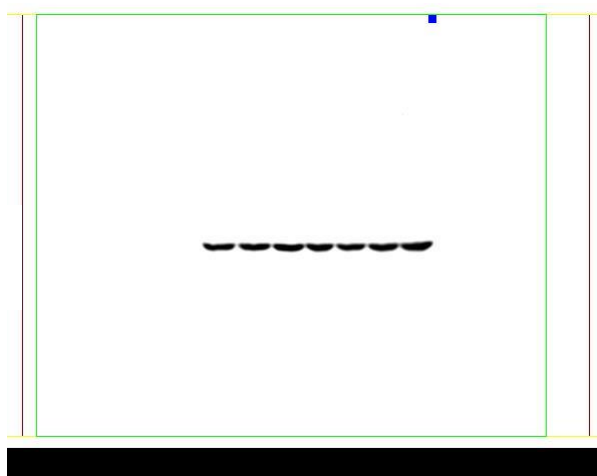

**Supplementary Figure 3** MΦ-THP-1 was pretreated with inhibitor SP600125(20  $\mu$ M) for 30 min and then treated with HCV core protein for 30 min followed by analysis of p-JNK, JNK and GAPDH expression by Western blotting.

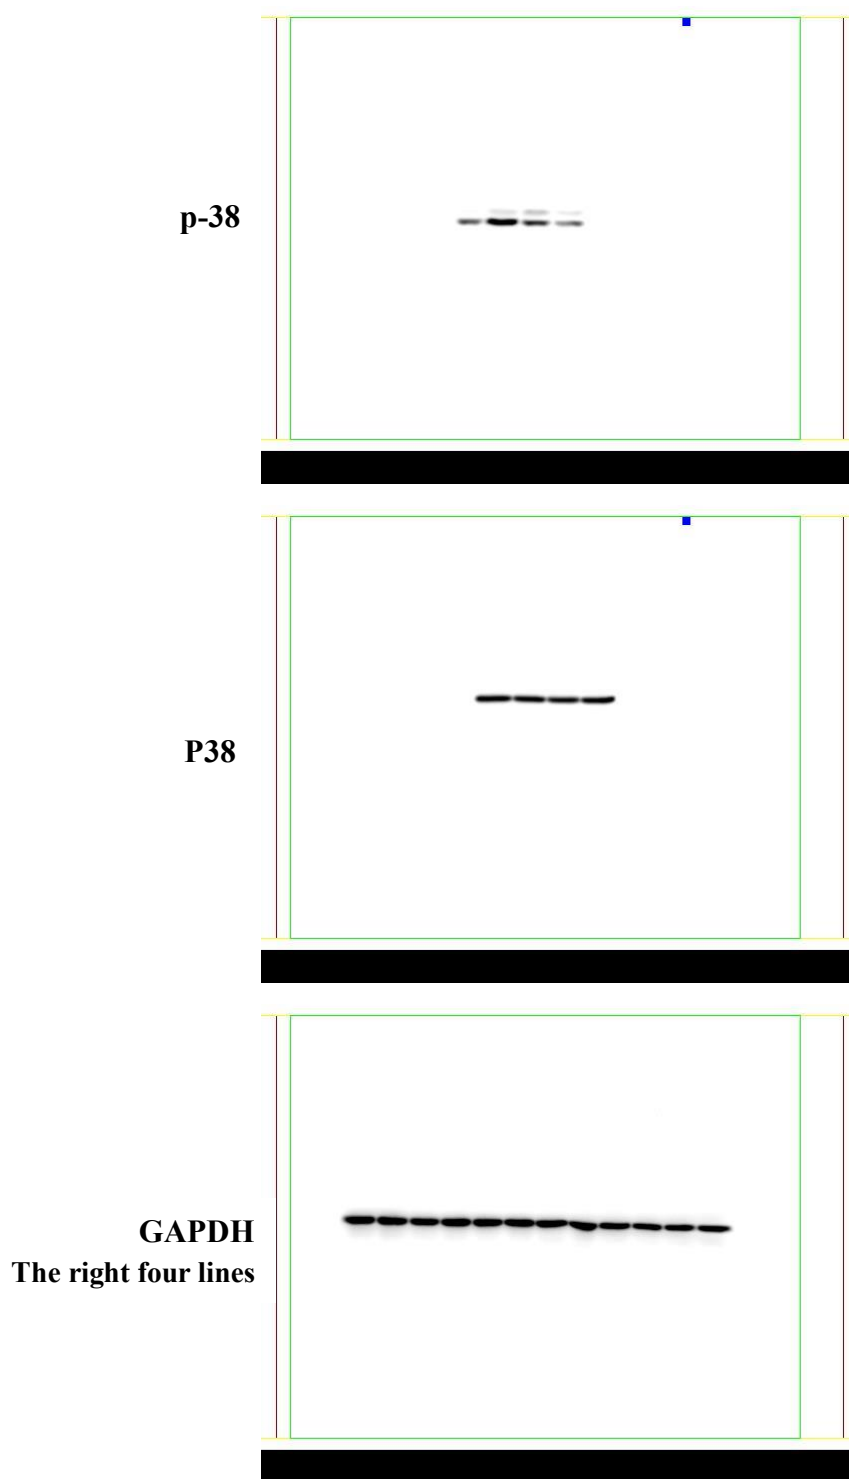

**Supplementary Figure 4** MΦ-THP-1 were pretreated with inhibitor SB203580(10  $\mu$ M or 30  $\mu$ M) for 30 min and then treated with HCV core protein for 30 min followed by analysis of p-p38, p38 and GAPDH expression by Western blotting.

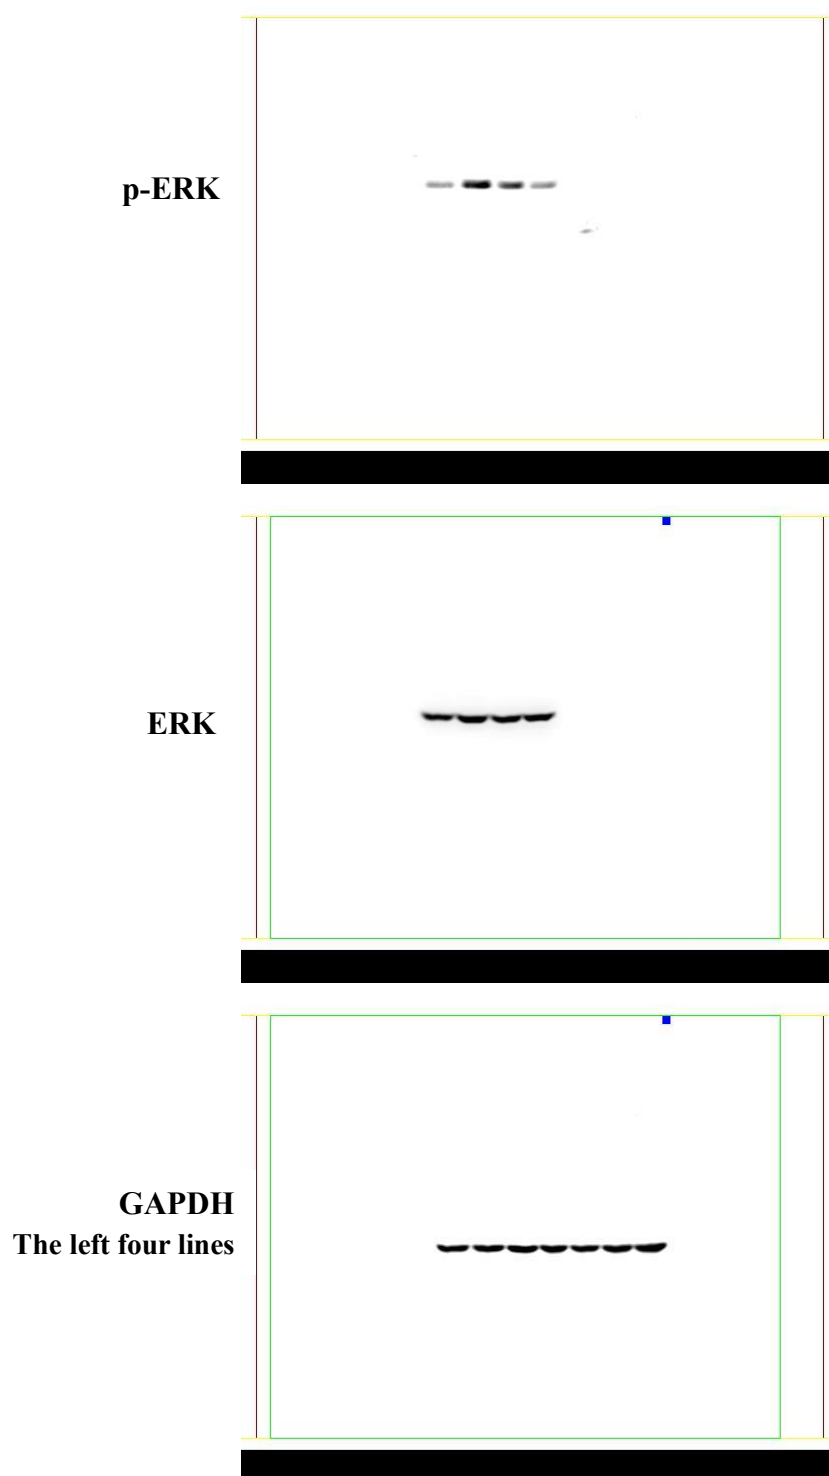

**Supplementary Figure 5** MΦ-THP-1 were pretreated with inhibitor PD98059(30μM or 50μM) for 30 min and then treated with HCV core protein for 30 min followed by analysis of p-ERK, ERK and GAPDH expression by Western blotting.

**FLAG**

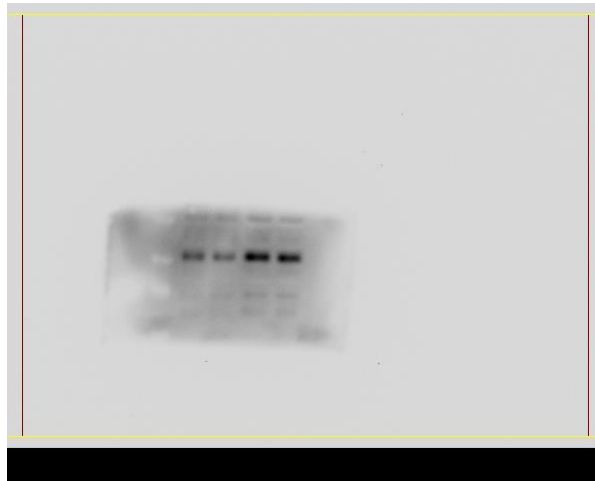

**HCV core**

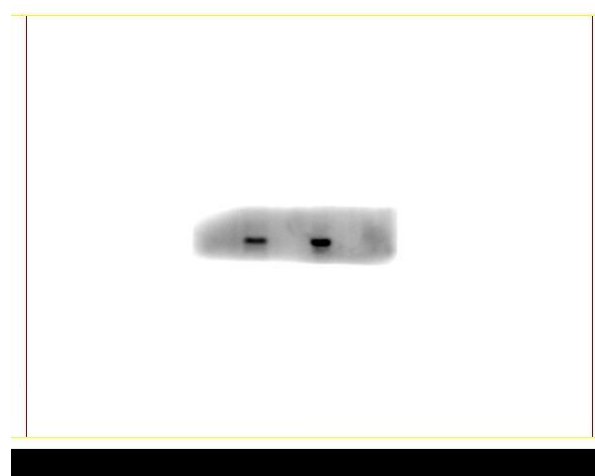

**Supplementary Figure 6** HEK 293T cells were co-transfected with SFB-Flag-gC1qR and pcDNA3.1-HCV core plasmids (co-transfected with SFB-Flag-gC1qR and pcDNA3.1 plasmid as control group). 48 h after transfection, cells were lysed with NTEN buffer and analyzed by immunoprecipitation and immunoblotting using the indicated antibodies.
